# Supplementary material for: New types of hybrid solids of tetravanadate polyanions and cucurbituril
Source: Royal Society of Chemistry journal article supplement (doi:10.1039/c2dt30559c), 2012-01-01

## Supporting Information for

### New types of hybrid solids of tetravanadate polyanion and cucurbituril

Li-Wei Han<sup>a,b</sup>, Jing-Xiang Lin<sup>a</sup>, Jian Lü<sup>a</sup> and Rong Cao<sup>a,\*</sup>

<sup>a</sup>*State Key Laboratory of Structural Chemistry, Fujian Institute of Research on the Structure of Matter, Chinese Academy of Sciences, Fujian, Fuzhou, 350002, P. R. China;* <sup>b</sup>*Graduate University of Chinese Academy of Sciences, Beijing, 100039, P. R. China*

**Table S1** The major H-bond length and angles in complexes **1-3**.

**Fig. S1** The 3-D packing pattern of compound **1**.

**Fig. S2** The 3-D packing pattern of compound **2**.

**Fig. S3** The 3-D packing pattern of compound **3**.

**Table S1**

---

| <b>D-H</b>                                                     | <b>d(D-H)</b> | <b>d(H···A)</b> | <b>&lt;DHA</b> | <b>d(D···A)</b> | <b>A</b> |
|----------------------------------------------------------------|---------------|-----------------|----------------|-----------------|----------|
| <b>Complex 1</b>                                               |               |                 |                |                 |          |
| N21-H19                                                        | 0.827         | 2.061           | 171.47         | 2.882           | O2w      |
| N22-H2                                                         | 0.845         | 2.114           | 162.45         | 2.931           | O5       |
| N21-H38                                                        | 0.827         | 2.086           | 154.60         | 2.855           | O6       |
| N21-H36                                                        | 0.849         | 2.053           | 159.78         | 2.864           | O8       |
| <b>Complex 2</b>                                               |               |                 |                |                 |          |
| only D···A distances are listed due to non-location of H atoms |               |                 |                |                 |          |
| O18                                                            |               |                 |                | 2.893           | O20      |
| O15                                                            |               |                 |                | 2.875           | O18      |
| O15                                                            |               |                 |                | 2.938           | O81      |
| O78                                                            |               |                 |                | 2.866           | O81      |
| O18                                                            |               |                 |                | 2.883           | O18      |

---

**Fig. S1**

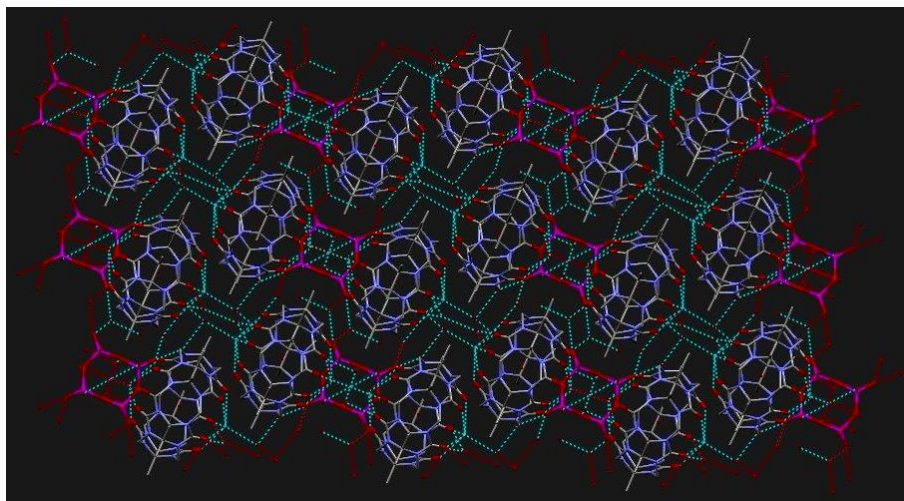

**Fig. S2**

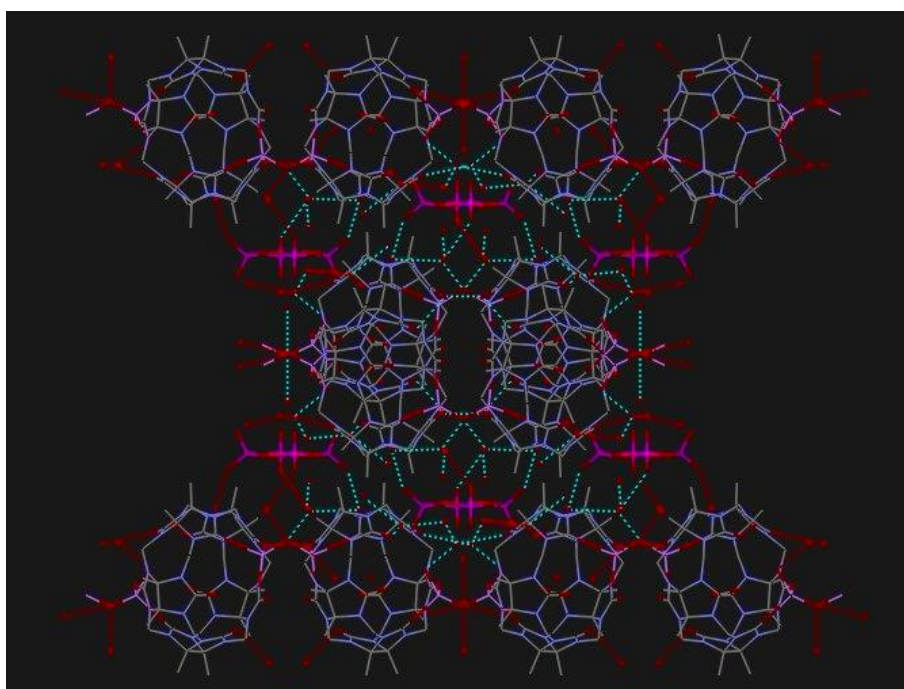

**Fig. S3**

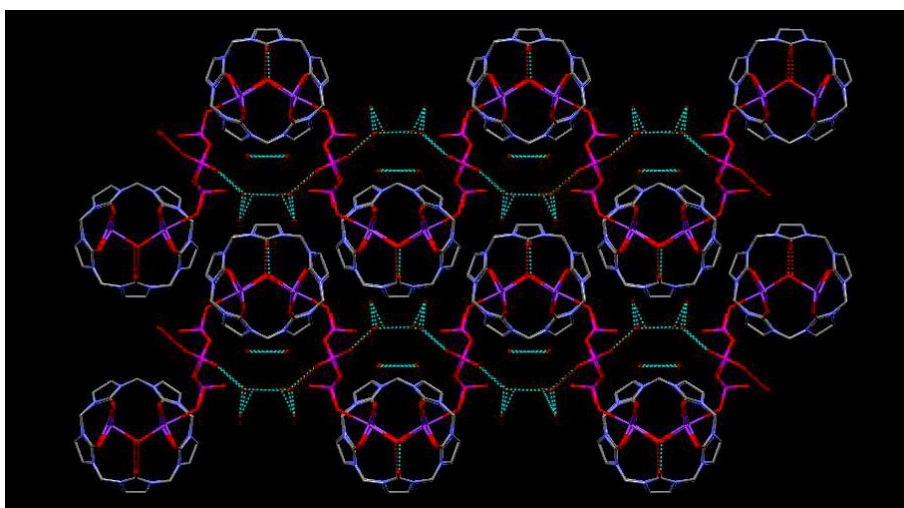

Supplement: c2dt30559c.pdf [file c2dt30559c.pdf]
